# Supplementary material for: Computational-Driven Epitope Verification and Affinity Maturation of TLR4-Targeting Antibodies
Source: MDPI journal article supplement (doi:10.3390/ijms22115989), 2021-06-01
Supplement: s1 [file s1]

# Supplementary Material

## Computational-Driven Epitope Verification and Affinity Maturation of TLR4-Targeting Antibodies

Bilal Ahmad <sup>1</sup>, Maria Batool <sup>1,2</sup>, Moon Suk Kim <sup>1</sup> and Sangdun Choi <sup>1,2,\*</sup>

<sup>1</sup> Department of Molecular Science and Technology, Ajou University, Suwon 16499, Korea; bilalpharma77@gmail.com (B.A.); mariabatoool.28@gmail.com (M.B.); moonskim@ajou.ac.kr (M.S.K.)

<sup>2</sup> S&K Therapeutics, Woncheon Hall 135, Ajou University, Suwon 16499, Korea

\* Correspondence: sangdunchoi@ajou.ac.kr; Tel.: +82-31-219-2600; Fax: +82-31-219-1615

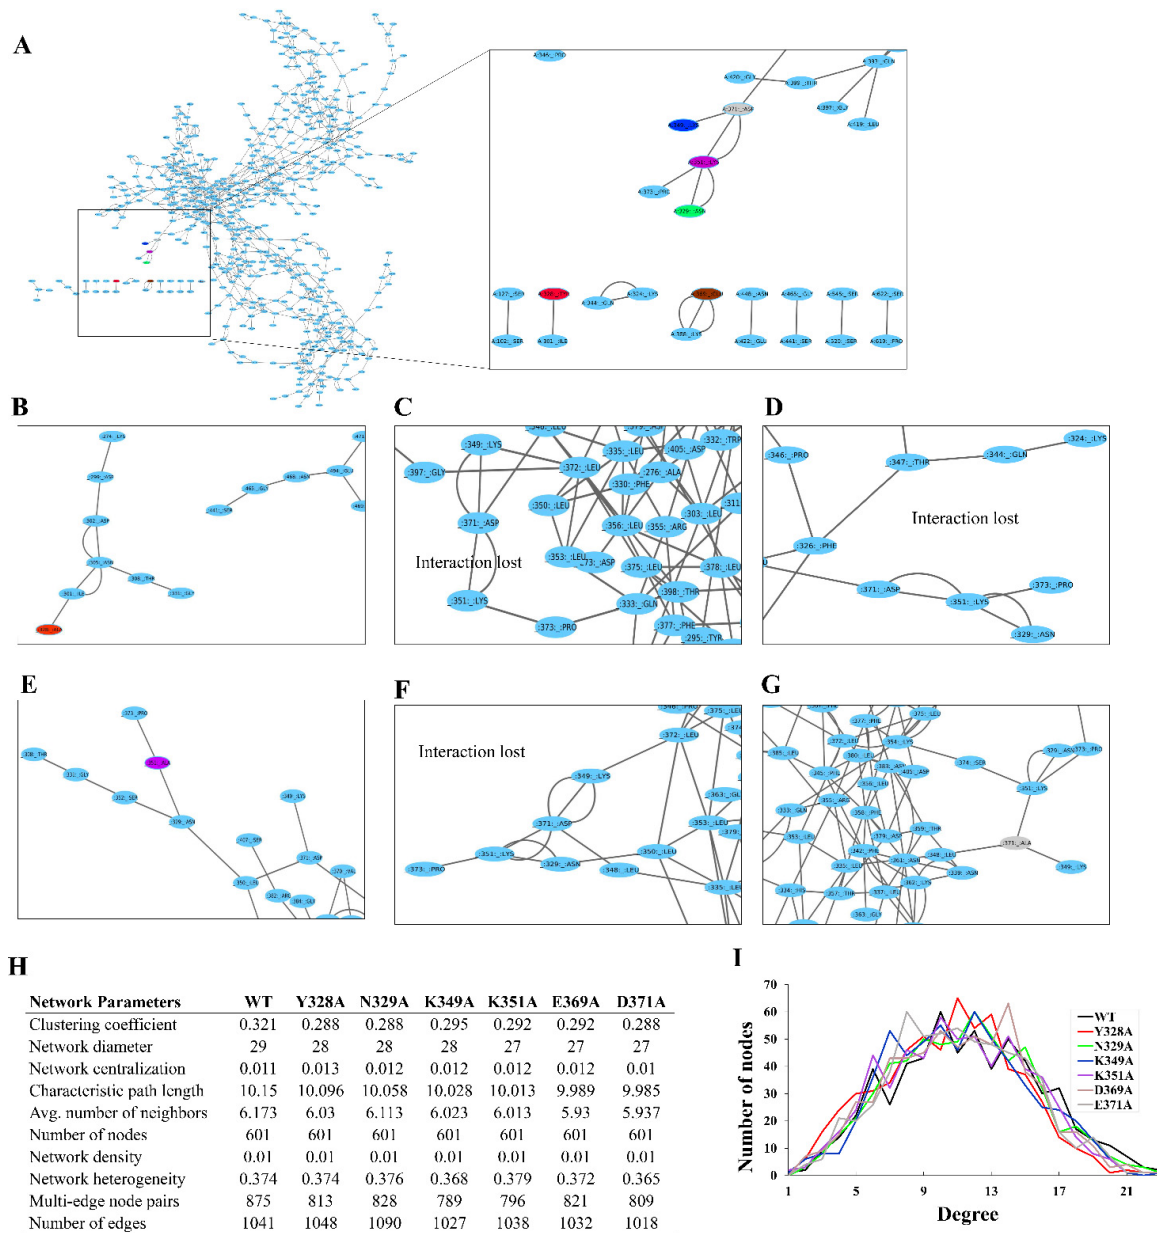

**Figure S1.** Network topology of the epitope of TLR4 and its mutants. (A) The residues constituting the epitope in the network are shown in red (Y328), green (N329), blue (K349), magenta (K351), brown (D369), and grey (E371). (B) Y328A (red) forms a small community. The network interactions are lost in

(C) N329A, (D) K349A, and (E) D369A, whereas (B) Y328A forms a small community and (G) D371A remains a part of the whole network. (H) The residue network properties are shown in the table for the wild-type and mutant TLR4. (I) A node degree distribution is provided.

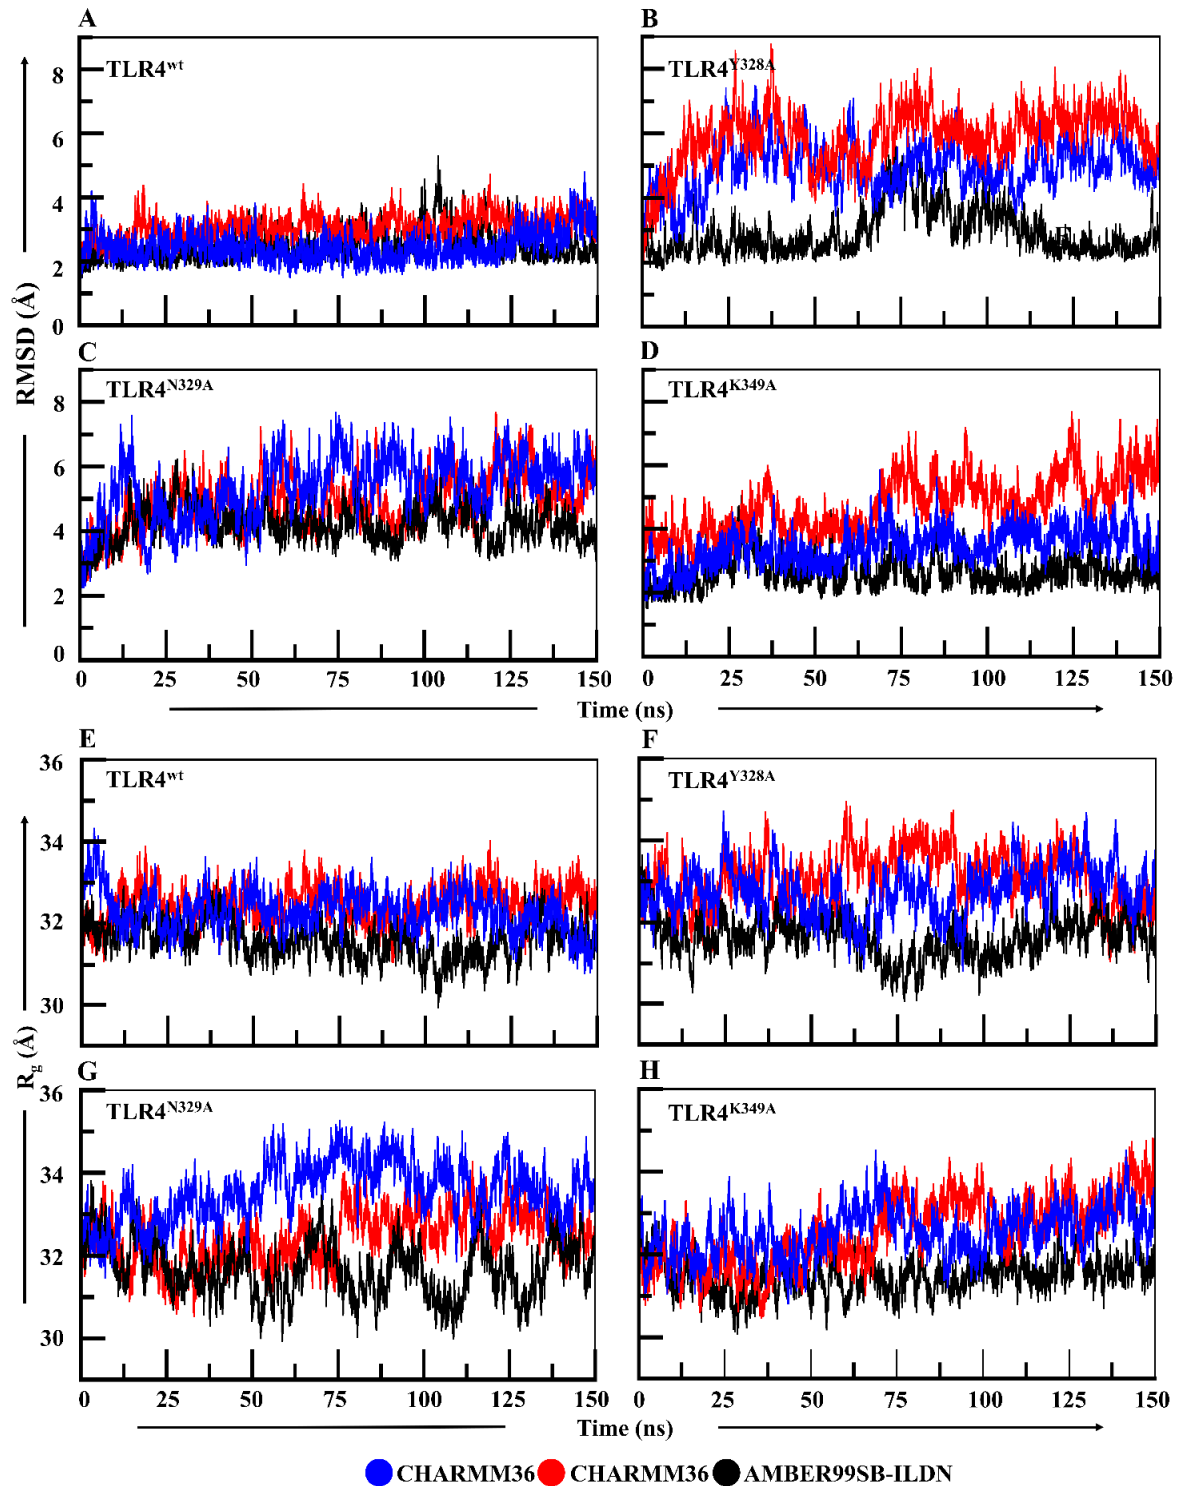

**Figure S2.** RMSD and  $R_g$  for TLR4<sup>wt</sup> and mutants using CHARMM36 and AMBER99SB-ILDN force fields. The RMSD (A-D) of TLR4<sup>wt</sup> and mutants showed a similar trend in both run of MD simulation when CHARMM36 (blue and red) force field was used except TLR4<sup>K349A</sup> fluctuates a bit higher RMSD in 75-150ns time point. With the use of AMBER99SB-ILDN (black) force field RMSD was lower in all trajectories as compared to CHARMM36.  $R_g$  (E-H) of the TLR4 and mutants showed a similar pattern in both MD runs using CHARMM36 force field but  $R_g$  value is lower with AMBER99SB-ILDN force field.

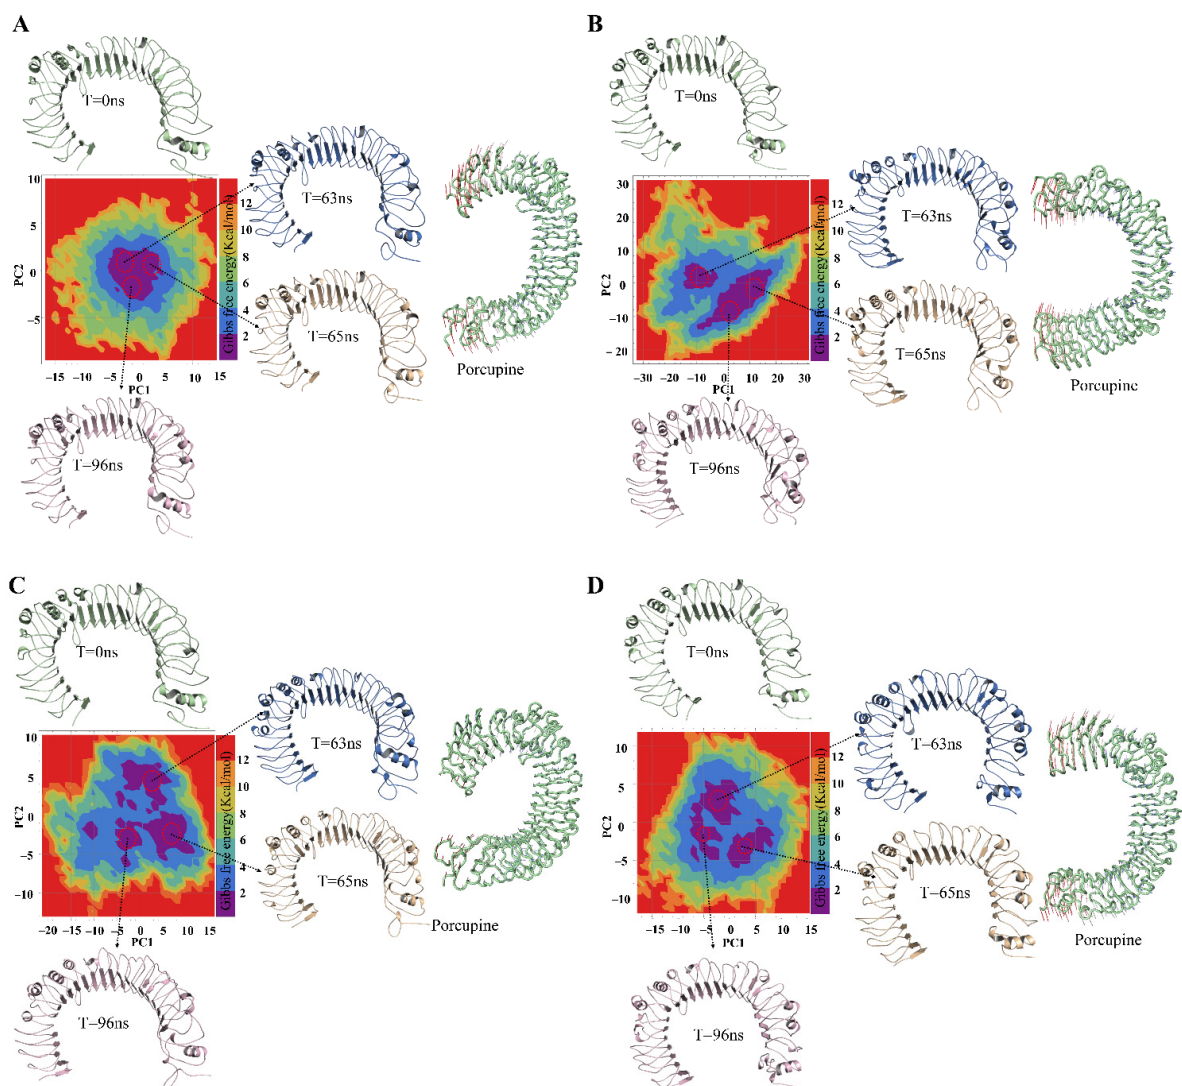

Figure S3. Continued...

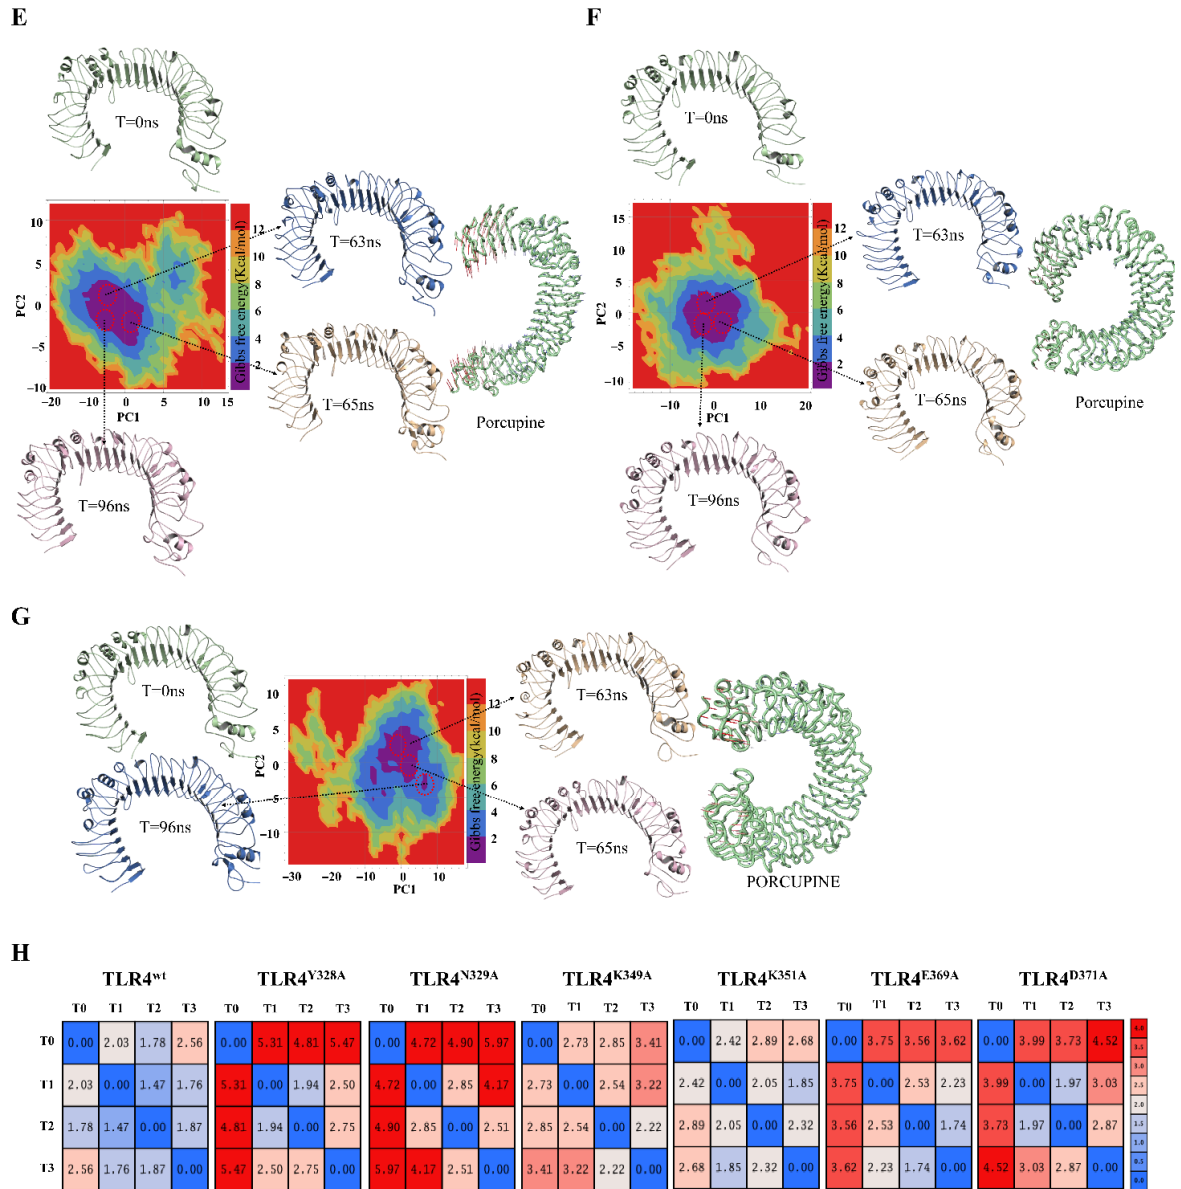

**Figure S3.** The FEL and representative structures. The FEL was computed from PC1 and PC2 as reaction coordinates for (A) TLR4<sup>wt</sup>, E) TLR4<sup>K351A</sup>, F) TLR4<sup>E369A</sup>, and G) TLR4<sup>E369A</sup> where all conformations remained confined to one minimum. (B) TLR4<sup>Y328A</sup> conformations split into two minima with a higher energy barrier. (C) TLR4<sup>Y329A</sup> and (D) TLR4<sup>K349A</sup> split into three minima. A representative lowest-energy structure from local minima shown by red circles was extracted in (A, B, C, D, E, F, and G), and the porcupine plot represents the of motion of TLR4<sup>wt</sup> and mutant. H) RMSDs with their respective first or 0 ns frame structure and with one another are shown.

**A**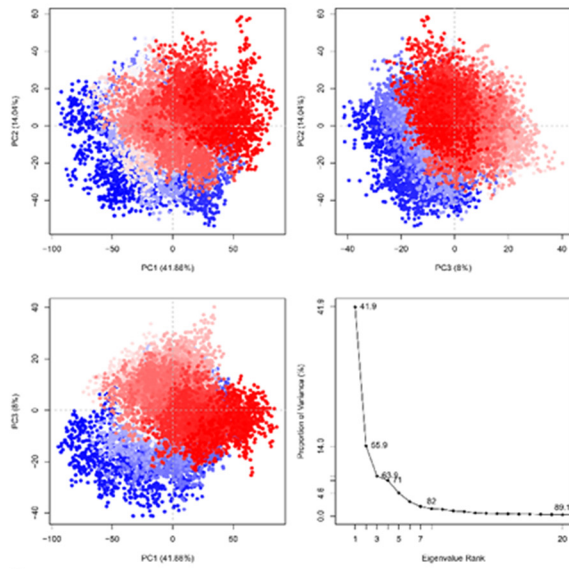**B**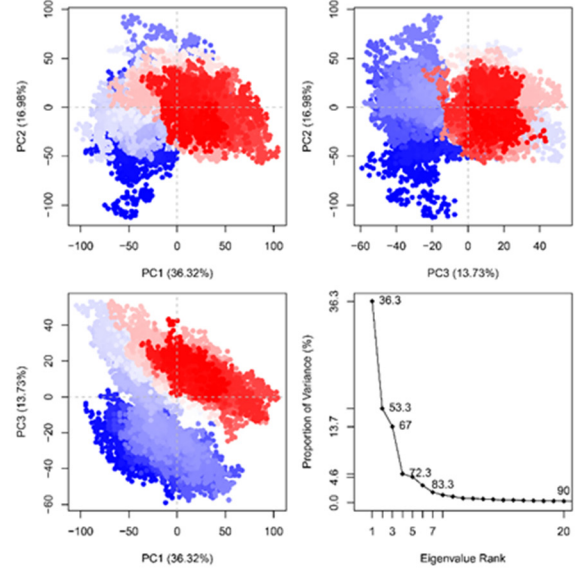**C**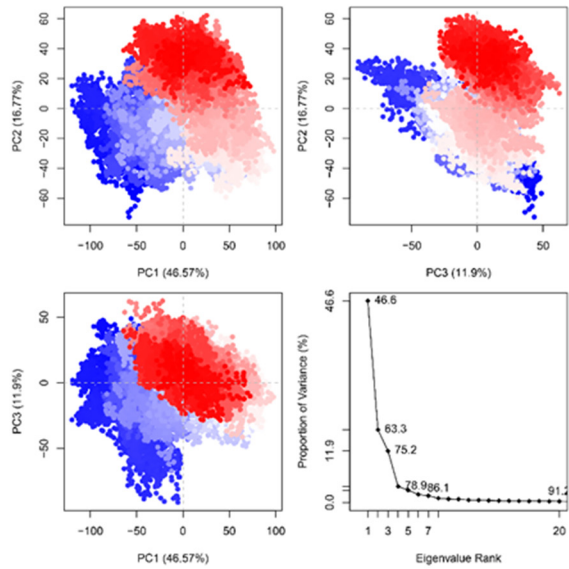**D**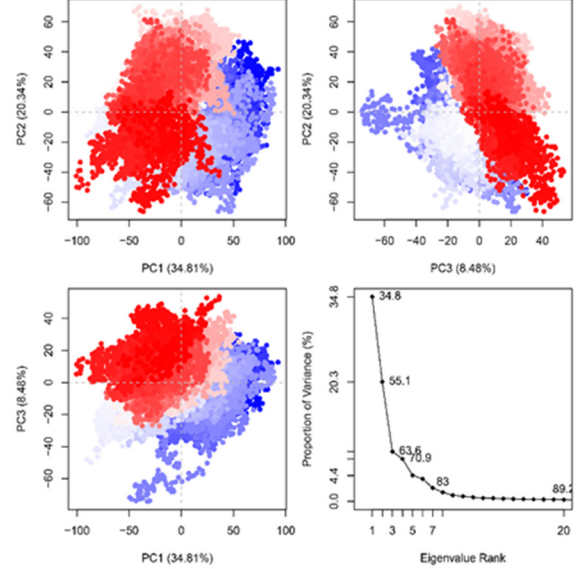**FigureS 4. Continued...**



**E**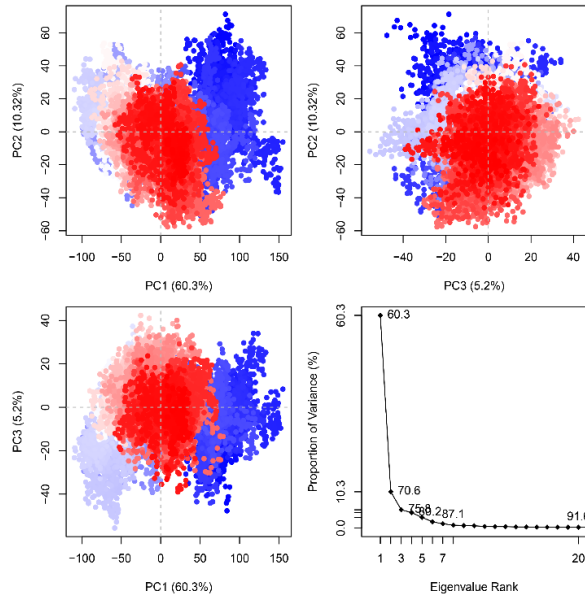**F**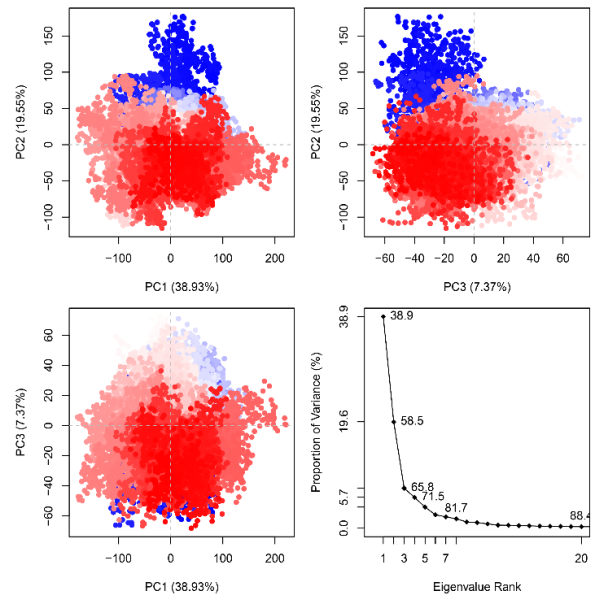**G**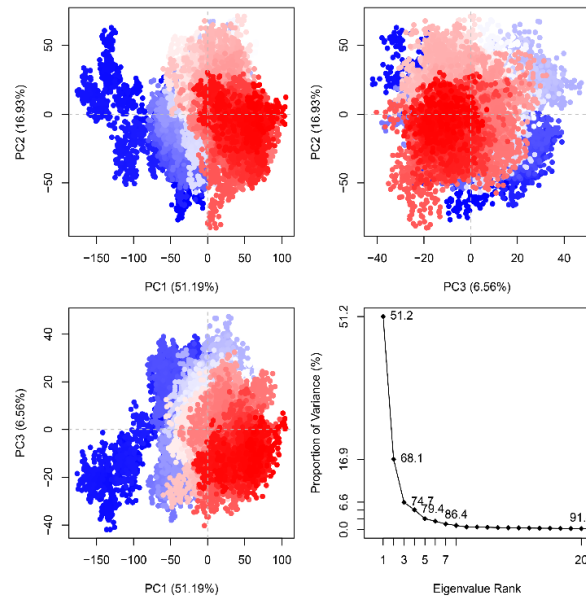

**Figure S4.** PCA for TLR4<sup>wt</sup> and mutants. The cloud reflects (A) TLR4<sup>wt</sup>, (B) TLR4<sup>Y328A</sup>, (C) TLR4<sup>N329A</sup>, (D) TLR4<sup>K349A</sup>, (E) TLR4<sup>K351A</sup>, (F) TLR4<sup>E369A</sup>, and (G) TLR4<sup>D371A</sup> trajectory projections. The total mean square displacement of residue positional fluctuations captured in each dimension is characterized by a corresponding eigenvalue (principal components; PCs). The continuous color scale from blue to red indicates that there are periodic jumps between these conformers throughout the trajectory.

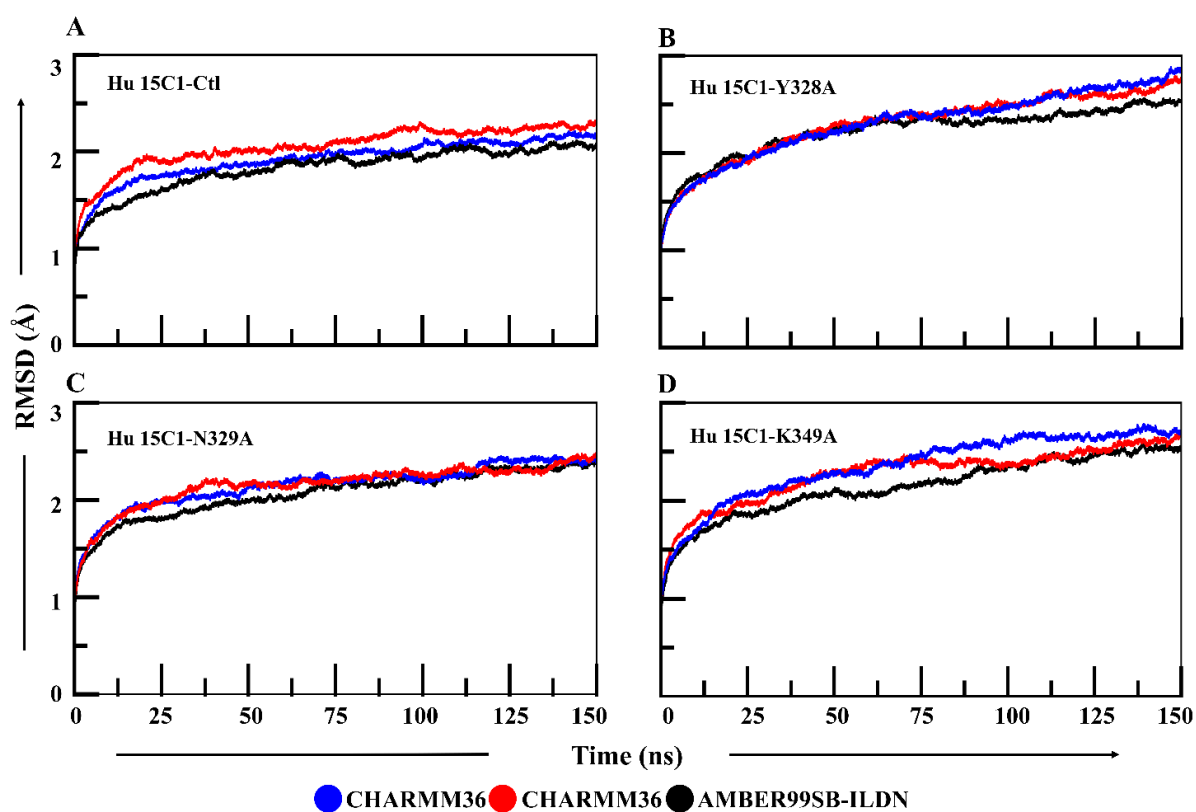

**Figure S5.** Effect of CHARMM36 (blue and red) and AMBER99SB-ILDN (black) force fields on RMSD of TLR4-mAb mutein complexes.

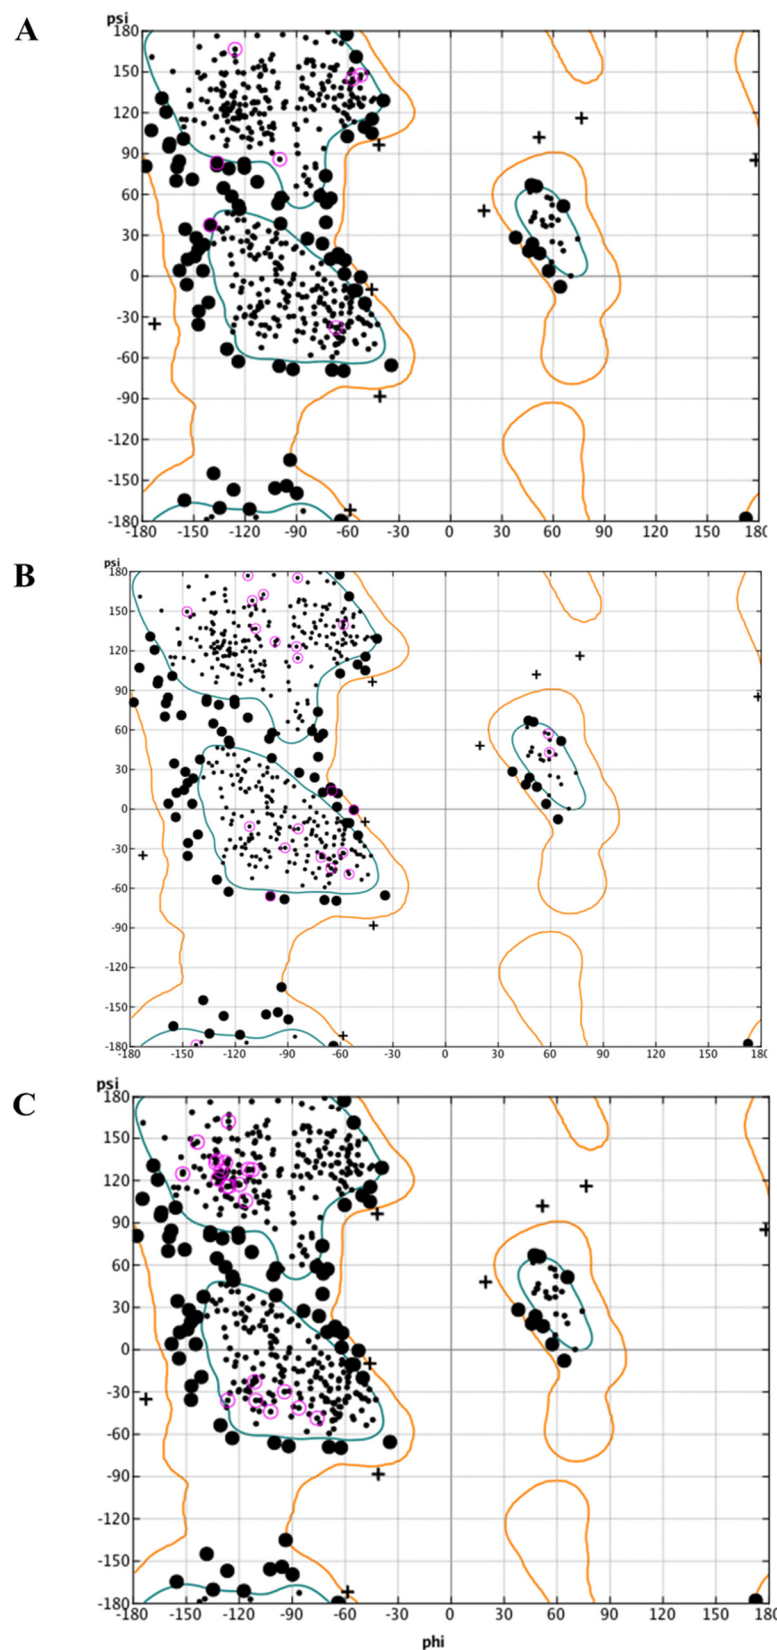

**Figure S6.** Ramachandran plot of epitopes. Residues of (A) Ctl, (B) EP1, and (C) EP2 are highlighted in magenta circles in different quadrants of the plot.



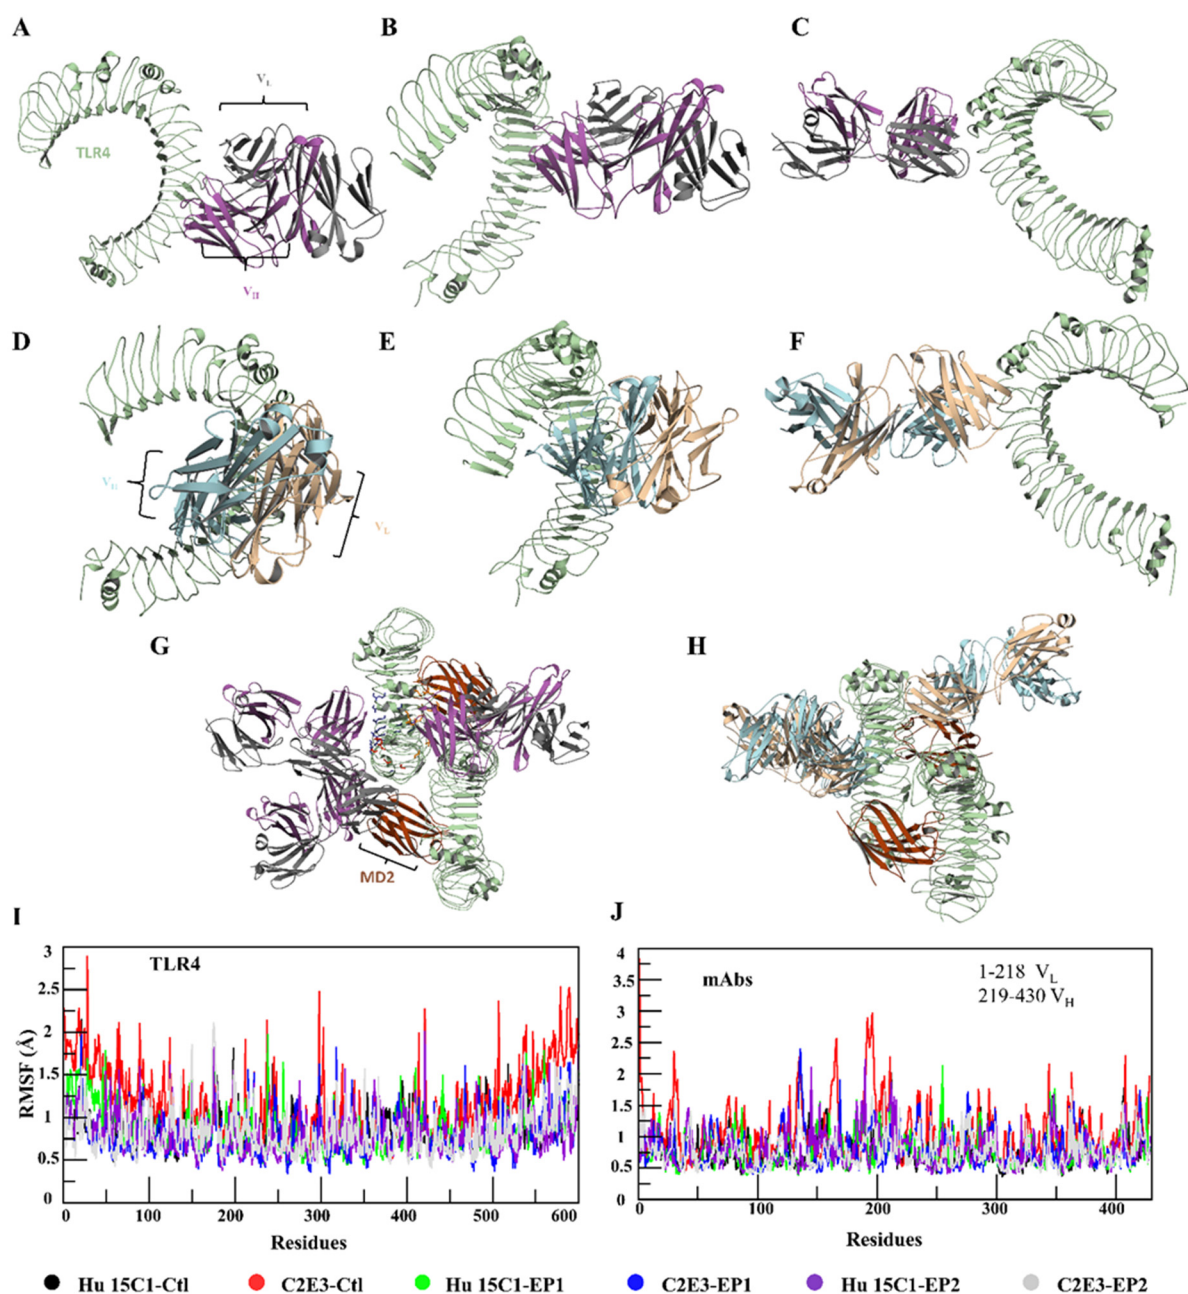

**Figure S7.** Hu 15C1 and C2E3 prevent the dimerization of human TLR4 by binding at different sites. Hu 15C1 and C2E3 Fab were docked to TLR4 at three epitopes: (A, D) Ctl, (B, E) EP1, and (C, F) EP2. Superimposition of the structure of the human TLR4-MD2 dimer: the first TLR4 monomer with (G) Hu 15C1 Fab, and the second TLR4 monomer with (H) C2E3 Fab. RMSF of (I) TLR4's and (J) antibodies' residues during complex formation.

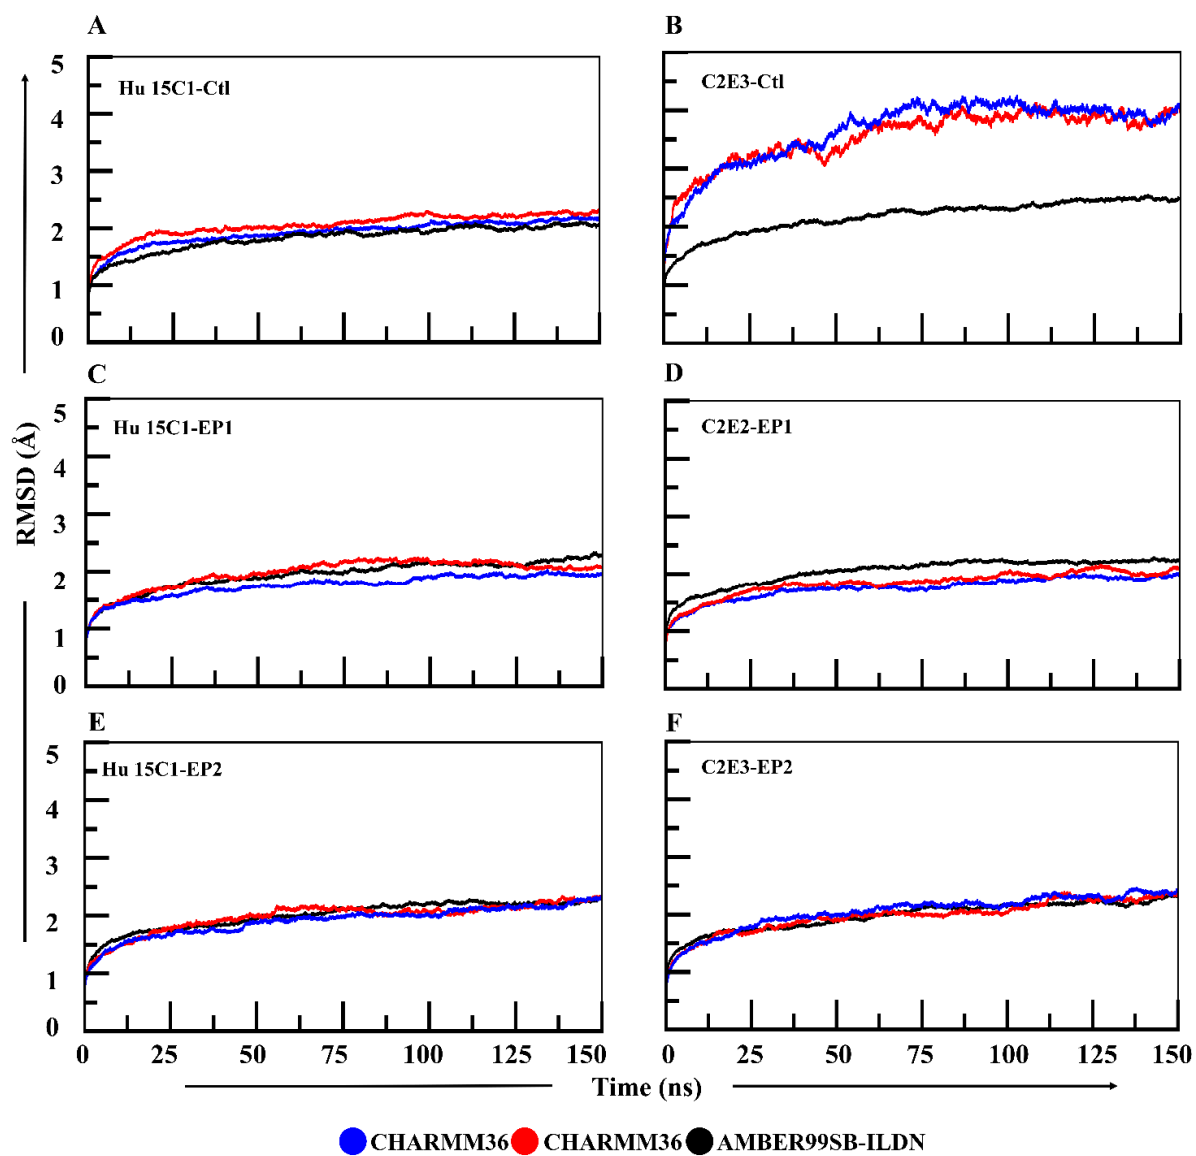

**Figure S8.** RMSD of TLR4-mAbs at three sites. The change in the RMSD at three epitopes: (A, B) Ctl, (C, D) EP1, and (E, F) EP2 simulated with CHARMM36 (blue and red) and AMBER99SB-ILDN (black).

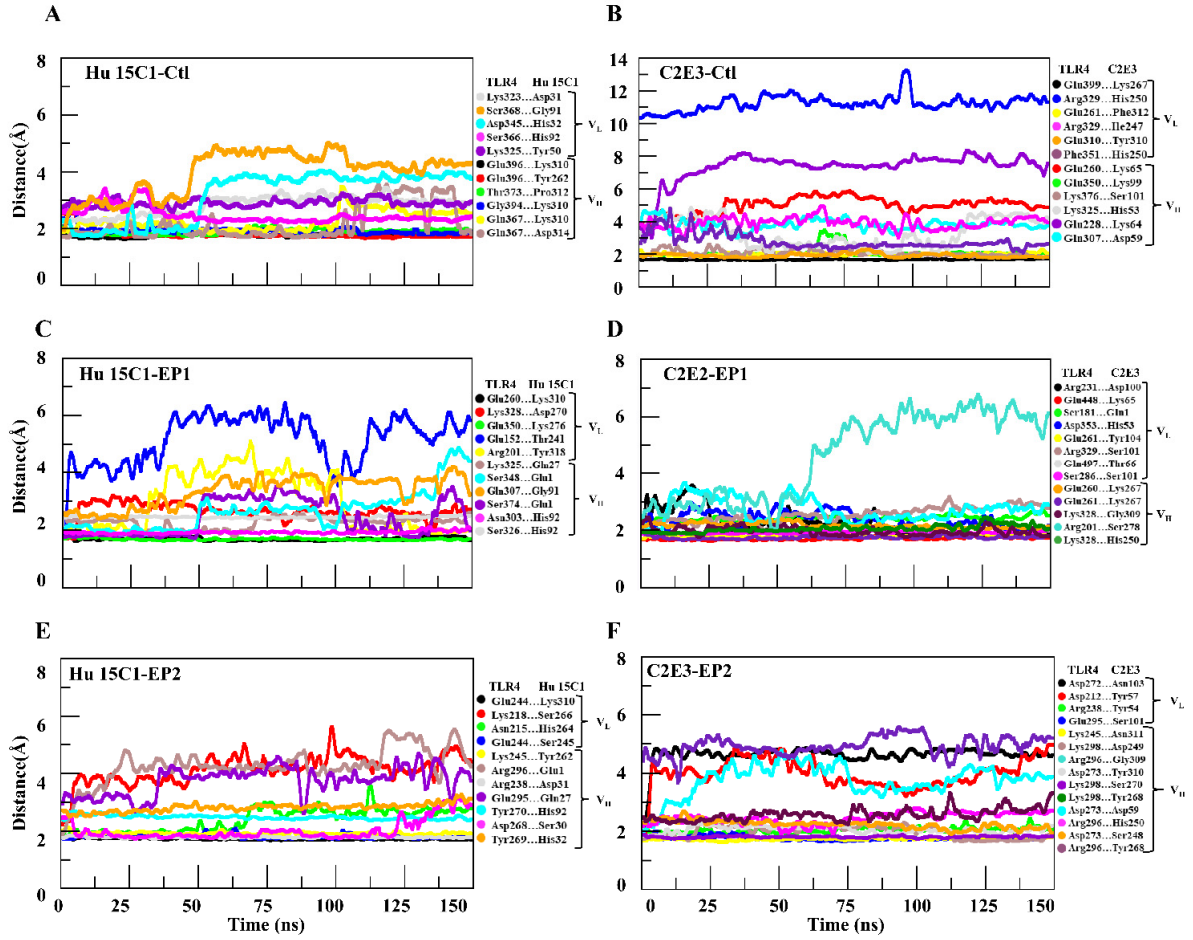

**Figure S9.** Interface analysis. The minimum distances of Hu 15C1 and C2E3 to TLR4's interacting residues in epitopes (A, B) Ctl, (C, D) EP1, and (E, F) EP2.

**Table S1.** The residues of Hu 15C1's and C2E3's interfaces with TLR4 at reported epitope (Ctl).

| Reported Epitope (Ctl) |                |        |        |                       |         |           |   |
|------------------------|----------------|--------|--------|-----------------------|---------|-----------|---|
| mAb                    | TLR4           | Fab    | Bond   | E <sub>kcal/mol</sub> | Dist. Å | Frequency |   |
| Hu 15C1                | V <sub>L</sub> | Lys323 | Asp31  | IH                    | -29.4   | 2.86      | 4 |
|                        |                | Ser368 | Gly91  | H                     | -2.5    | 2.79      | 1 |
|                        |                | Asp345 | His32  | H                     | -2.1    | 3.02      | 1 |
|                        |                | Ser366 | His92  | H                     | -1.6    | 3.37      | 1 |
|                        |                | Lys325 | Tyr50  | A                     | -1.6    | 3.59      | 1 |
|                        | V <sub>H</sub> | Glu396 | Lys310 | IH                    | -24.54  | 2.76      | 3 |
|                        |                | Glu396 | Tyr262 | H                     | -5.1    | 2.6       | 1 |
|                        |                | Thr373 | Pro312 | H                     | -4.7    | 2.83      | 1 |
|                        |                | Gly394 | Lys310 | H                     | -3.6    | 2.98      | 1 |
| C2E3                   | V <sub>H</sub> | Glu260 | Lys65  | IH                    | -26.88  | 2.82      | 3 |
|                        |                | Glu350 | Lys99  | IH                    | -23.94  | 3.08      | 3 |
|                        |                | Lys376 | Ser101 | H                     | -5.8    | 2.92      | 1 |
|                        |                | Lys325 | His53  | H                     | -3.4    | 2.95      | 1 |
|                        |                | Glu228 | Leu64  | H                     | -2.9    | 2.9       | 1 |
|                        |                | Gln307 | Asp59  | H                     | -2.8    | 2.89      | 1 |
|                        | V <sub>L</sub> | Glu399 | Lys267 | IH                    | -31.34  | 2.8       | 4 |
|                        |                | Arg329 | His250 | H                     | -13.5   | 2.93      | 2 |
|                        |                | Glu261 | Phe312 | H                     | -5.9    | 2.75      | 1 |
|                        |                | Arg329 | Ile247 | H                     | -2.7    | 3.1       | 1 |
|                        |                | Glu310 | Tyr310 | H                     | -2.3    | 2.7       | 1 |
|                        |                | Phe351 | His250 | A                     | 0       | 3.66      | 1 |

**Table S2.** The residues of Hu 15C1's and C2E3's interfaces with TLR4 at EP1.

| Epitope 1(EP1) |                |        |        |                       |         |           |   |
|----------------|----------------|--------|--------|-----------------------|---------|-----------|---|
| mAb            | TLR4           | Fab    | Bond   | E <sub>kcal/mol</sub> | Dist. Å | Frequency |   |
| Hu 15C1        | V <sub>H</sub> | Lys325 | Gln27  | IH                    | -9.4    | 2.57      | 1 |
|                |                | Ser348 | Glu1   | H                     | -6      | 3.03      | 1 |
|                |                | Gln307 | Gly91  | H                     | -3.4    | 2.79      | 1 |
|                |                | Ser374 | Glu1   | H                     | -3.1    | 2.64      | 1 |
|                |                | Asn303 | His92  | H                     | -2.4    | 2.91      | 1 |
|                |                | Asn303 | Ser30  | H                     | -1.2    | 2.97      | 1 |
|                |                | Ser348 | Ser93  | H                     | -0.9    | 3.06      | 1 |
|                |                | Ser326 | His92  | H                     | -0.7    | 3.65      | 1 |
|                |                | Asn303 | Asp59  | H                     | -0.6    | 3.32      | 1 |
|                | V <sub>L</sub> | Glu260 | Lys310 | HI                    | -26.64  | 2.8       | 3 |
|                |                | Lys328 | Asp270 | HI                    | -23.41  | 2.77      | 3 |
|                |                | Glu350 | Lys276 | HI                    | -18.45  | 2.98      | 3 |
|                |                | Glu152 | Thr241 | H                     | -2.2    | 2.87      | 1 |
|                |                | Arg201 | Tyr318 | H                     | -2.2    | 2.97      | 1 |
|                |                | Glu261 | Tyr265 | A                     | -1.1    | 3.13      | 1 |
|                |                | Ser286 | Tyr265 | H                     | -0.7    | 2.93      | 1 |
| C2E3           | V <sub>L</sub> | Arg231 | Asp100 | IH                    | -25.99  | 3.07      | 7 |
|                |                | Glu448 | Lys65  | IH                    | -19.91  | 2.66      | 2 |
|                |                | Ser181 | Gln1   | H                     | -5.9    | 2.75      | 1 |
|                |                | Asp353 | His53  | H                     | -5.3    | 2.77      | 1 |
|                |                | Glu261 | Tyr104 | H                     | -2.7    | 2.72      | 1 |
|                |                | Arg329 | Ser101 | H                     | -2.4    | 2.9       | 1 |
|                |                | Gln497 | Thr66  | H                     | -1.9    | 3.18      | 1 |
|                |                | Ser286 | Ser101 | H                     | -1.7    | 2.64      | 1 |
|                |                | Phe351 | His53  | A                     | -0.5    | 4.05      | 1 |
|                |                | His400 | Tyr57  | A                     | 0       | 3.94      | 1 |
|                | V <sub>H</sub> | Glu260 | Lys267 | IH                    | -25.14  | 2.73      | 2 |
|                |                | Glu261 | Lys267 | IH                    | -12.91  | 2.94      | 2 |
|                |                | Lys328 | Gly309 | H                     | -7.2    | 3         | 1 |
|                |                | Arg201 | Ser278 | H                     | -3.7    | 2.92      | 1 |
|                |                | Lys328 | His250 | H                     | -2.4    | 2.87      | 1 |
|                |                | Glu228 | Ser274 | H                     | -1.1    | 3.32      | 1 |



**Table S3.** The residues of Hu 15C1's and C2E3's interfaces with TLR4 at EP2.

| Epitope 2(EP2) |                |        |        |                       |        |           |   |
|----------------|----------------|--------|--------|-----------------------|--------|-----------|---|
| mAb            | TLR4           | Fab    | Bond   | E <sub>kcal/mol</sub> | Dist Å | Frequency |   |
| Hu 15C1        | V <sub>H</sub> | Arg296 | Glu1   | IH                    | -25.95 | 3.09      | 6 |
|                |                | Arg238 | Asp31  | IH                    | -20.7  | 3.05      | 4 |
|                |                | Glu295 | Gln27  | H                     | -6.5   | 2.88      | 1 |
|                |                | Tyr270 | His92  | H                     | -3.7   | 3.05      | 1 |
|                |                | Asp268 | Ser30  | H                     | -1.6   | 2.53      | 1 |
|                |                | Tyr269 | His32  | H                     | -0.7   | 3.93      | 1 |
|                | V <sub>L</sub> | Glu244 | Lys310 | H                     | -8.2   | 2.85      | 1 |
|                |                | Lys218 | Ser266 | H                     | -7.2   | 2.87      | 1 |
|                |                | Asn215 | His264 | H                     | -5.8   | 3         | 1 |
|                |                | Glu244 | Ser245 | H                     | -4.6   | 2.62      | 1 |
| Lys245         |                | Tyr262 | H      | -1.8                  | 2.98   | 1         |   |
| C2E3           | V <sub>L</sub> | Asp272 | Asn103 | H                     | -3.9   | 2.7       | 1 |
|                |                | Asp212 | Tyr57  | H                     | -3.3   | 2.61      | 1 |
|                |                | Arg238 | Tyr54  | H                     | -2.3   | 3.01      | 1 |
|                |                | Glu295 | Ser101 | H                     | -1.7   | 2.89      | 1 |
|                |                | Glu244 | Tyr51  | H                     | -1.2   | 2.95      | 1 |
|                |                | Glu240 | Ser55  | H                     | -1     | 2.74      | 1 |
|                | V <sub>H</sub> | Lys245 | Asp311 | IH                    | -23.13 | 2.85      | 2 |
|                |                | Lys298 | Asp249 | IH                    | -16.21 | 2.99      | 4 |
|                |                | Lys298 | Tyr268 | H                     | -7.8   | 2.65      | 1 |
|                |                | Arg296 | Gly309 | H                     | -6.6   | 2.78      | 1 |
|                |                | Lys298 | Ser270 | H                     | -6.6   | 2.92      | 1 |
|                |                | Lys248 | Ser246 | H                     | -5.8   | 3.02      | 1 |
|                |                | Asp273 | Tyr310 | H                     | -5.1   | 2.59      | 1 |
|                |                | Arg296 | His250 | H                     | -4.9   | 2.76      | 1 |
|                |                | Asp273 | Ser248 | H                     | -2.4   | 2.81      | 1 |
|                |                | Arg296 | Tyr268 | A                     | -0.5   | 4.58      | 1 |
